# Supplementary material for: Electrolyte and renal disorders in patients with newly diagnosed glioblastoma
Source: Research Square preprint supplement (doi:10.21203/rs.3.rs-84298/v1), 2020-10-06
Supplement: Supplementary file 1 [file a404d6a5e8b59602bf10e4e4.docx]

A.

|  | HR | p-value | 95% CI | |
| --- | --- | --- | --- | --- |
| Sex | 1.003 | 0.967 | 0.870 | 1.157 |
| Age (continuous) | 1.025 | <0.001 | 1.017 | 1.033 |
| Open Surgery | 0.443 | <0.001 | 0.375 | 0.522 |
| KPSpre_u80 | 1.458 | <0.001 | 1.211 | 1.755 |
| MGMT_methyl | 0.709 | <0.001 | 0.600 | 0.836 |
| IDH1_mut | 0.827 | 0.230 | 0.602 | 1.135 |
| RTX/CTX | 0.429 | <0.001 | 0.348 | 0.531 |
| Urea_o20 | 1.126 | 0.112 | 0.973 | 1.302 |

|  | HR | p-value | 95% CI | |
| --- | --- | --- | --- | --- |
| Sex | 1.029 | 0.701 | 0.889 | 1.192 |
| Age (continuous) | 1.026 | <0.001 | 1.018 | 1.034 |
| Open Surgery | 0.441 | <0.001 | 0.373 | 0.521 |
| KPSpre_u80 | 1.464 | <0.001 | 1.220 | 1.758 |
| MGMT_methyl | 0.704 | <0.001 | 0.595 | 0.832 |
| IDH1_mut | 0.831 | 0.262 | 0.595 | 1.160 |
| RTX/CTX | 0.438 | <0.001 | 0.354 | 0.542 |
| GFR<60 | 1.097 | 0.310 | 0.917 | 1.313 |

B.

|  | aOR | p-value | 95% CI | |
| --- | --- | --- | --- | --- |
| Sex | 1.181 | 0.346 | 0.835 | 1.671 |
| Age (continuous) | 0.963 | <0.001 | 0.948 | 0.979 |
| Open Surgery | 5.061 | <0.001 | 3.308 | 7.741 |
| KPSpre_u80 | 0.542 | 0.011 | 0.340 | 0.864 |
| MGMT_methyl | 1.719 | 0.003 | 1.202 | 2.459 |
| IDH1_mut | 2.110 | 0.132 | 0.775 | 5.743 |
| RTX/CTX | 5.205 | <0.001 | 2.820 | 9.607 |
| Urea_o20 | 0.765 | 0.184 | 0.514 | 1.140 |

|  | aOR | p-value | 95% CI | |
| --- | --- | --- | --- | --- |
| Sex | 1.108 | 0.559 | 0.785 | 1.564 |
| Age (continuous) | 0.961 | <0.001 | 0.946 | 0.977 |
| Open Surgery | 4.968 | <0.001 | 3.256 | 7.581 |
| KPSpre_u80 | 0.536 | 0.010 | 0.336 | 0.855 |
| MGMT_methyl | 1.719 | 0.003 | 1.202 | 2.459 |
| IDH1_mut | 2.083 | 0.132 | 0.779 | 5.571 |
| RTX/CTX | 5.242 | <0.001 | 2.834 | 9.695 |
| GFR<60 | 0.581 | 0.403 | 0.162 | 2.084 |

Table S1. Multivariate survival analysis for renal disorders.

A: Cox-Regression analysis for OS.

B: Binary logistic regression analysis for 1YS.

Abbreviations: HR: Hazard Ratio; 95% CI: 95% Confidence Interval; KPSpre_u80: Karnofsky Performance Scale under 80; MGMT_methyl: methylated MGMT-Promotor; IDH1_mut: mutated IDH1 gene; RTX/CTX: combined Radio- and Chemotherapy; Urea_o20: Serum urea level > 20 mg/dl; GFR<60: glomerular filtration rate < 60ml/min/1.73m2; OS: overall survival; 1YS: 1-year survival; aOR: adjusted Odds Ratio
